# Supplementary material for: Effects of azilsartan compared with telmisartan on insulin resistance in patients with essential hypertension and type 2 diabetes mellitus: An open-label, randomized clinical trial
Source: PubMed Central journal article supplement (PMC6447197; doi:10.1371/journal.pone.0214727), 2019-04-03
Supplement: pone.0214727.s002.pdf [file pone.0214727.s002.pdf]

**S2 Table. Number and Percentage of Subjects With Normal Clinic Blood Pressure Levels**

| Study Visit  | Telmisartan     | Azilsartan      |
|--------------|-----------------|-----------------|
|              | 40 mg<br>(N=16) | 20 mg<br>(N=17) |
| Week 4       | 7 / 16 (43.8)   | 6 / 16 (37.5)   |
| Week 8       | 5 / 16 (31.3)   | 5 / 16 (31.3)   |
| Week 12      | 3 / 16 (18.8)   | 5 / 15 (33.3)   |
| End of Study | 3 / 16 (18.8)   | 5 / 16 (31.3)   |
