# Supplementary material for: Effects of azilsartan compared with telmisartan on insulin resistance in patients with essential hypertension and type 2 diabetes mellitus: An open-label, randomized clinical trial
Source: PubMed Central journal article supplement (PMC6447197; doi:10.1371/journal.pone.0214727), 2019-04-03
Supplement: pone.0214727.s008.pdf [file pone.0214727.s008.pdf]

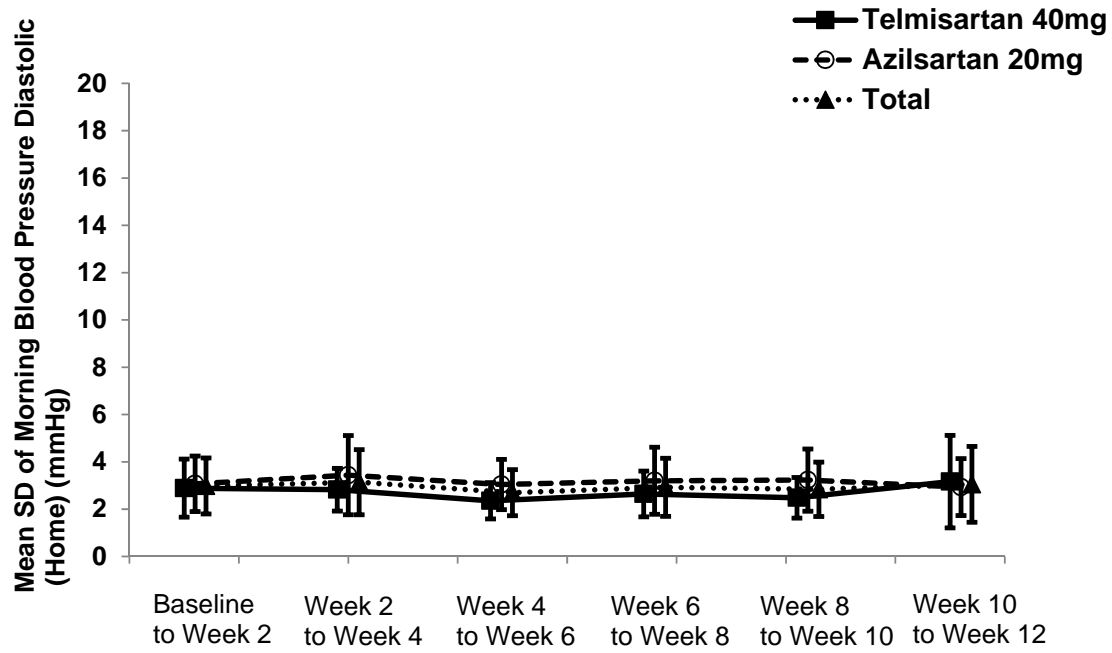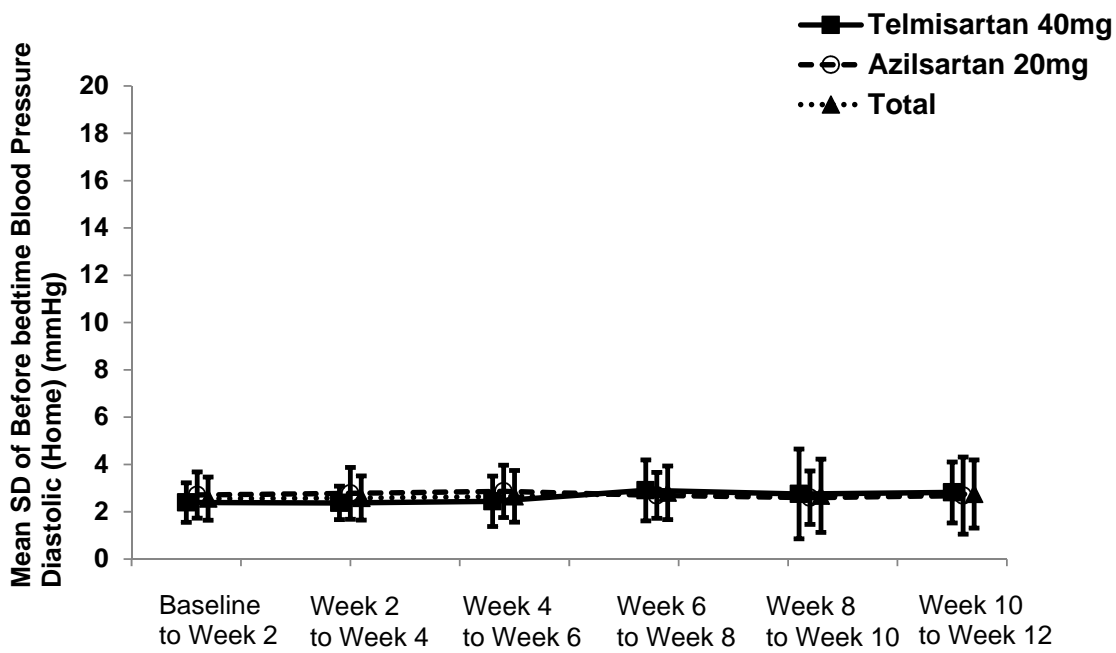

**S6 Fig. Circadian blood pressure variability (SD: Standard Deviation) for average of 1st and 2nd measurement for Morning / Bedtime Home DBP.**

Data are presented as mean  $\pm$ SD.
